# Supplementary material for: The parasitic nematode Strongyloides ratti exists predominantly as populations of long-lived asexual lineages
Source: PubMed Central journal article supplement (PMC10575991; doi:10.1038/s41467-023-42250-1), 2023-10-13

## SUPPLEMENTARY INFORMATION

### SUPPLEMENTARY TABLES

1. The occurrence of *S. rattii* in rat faecal pellets.
2. Rat microsatellite loci.
3. Population genetics of rat microsatellite loci.
4. Isofemale lines of *S. rattii* that were whole genome sequenced.
5. dN/dS ratios of expansion clusters and their flanking regions.
6. Sampling sites and times.

### SUPPLEMENTARY FIGURES

1. Frequency distribution of the number of *S. rattii* infective larvae isolated from infected rat faecal pellets.
2. The distribution of  $F_{IS}$  values for all SNPs.
3. Histogram of  $\Phi$  relatedness values among 90 *S. rattii* larvae.
4. The frequency distribution of the pairwise number of SNP differences among the 90 parasites.
5. Maximum likelihood trees of the 90 parasites.
6. ADMIXTURE analysis of the 90 parasites.
7. Linkage disequilibrium in the *S. rattii* genome.
8. Linkage disequilibrium in the *S. rattii* genome for clade 1 and 3 parasites.
9. Heatmaps of linkage disequilibrium in the *S. rattii* genome for clade 1 and 3 parasites.
10. Heatmaps of linkage disequilibrium in the *S. rattii* genome.
11. Model of clade ancestry
12. PCA analysis of *S. rattii* parasites.
13. Minimum spanning *S. rattii* mitochondrial haplotype maps.
14. Ritland and Lynch pairwise relatedness values of rats within sampling sites.
15. *S. rattii* neighbour-joining dendrograms of 10 isofemale lines and 90 larvae collected from the three sample sites.
16. The distribution of SNPs across the *S. rattii* genome.
17. Neighbour-joining dendrograms based on five expansion clusters.
18. Correlation of read depth and GC content for 90 *S. rattii* larvae.

## SUPPLEMENTARY TABLES

**Supplementary Table 1. The occurrence of *S. ratti* in rat faecal pellets.** The proportion of infected pellets did not differ significantly among the seasons when the faecal pellets were collected (Chi-squared test,  $\chi^2 = 6$ ,  $df = 3$ ,  $P = 0.11$ ).

| Site and season        | Number of pellets collected | Number (and %) of infected pellets | Number of larvae collected | Mean (SD) number of larvae per infected pellet |
|------------------------|-----------------------------|------------------------------------|----------------------------|------------------------------------------------|
| CA, Spring             | 35                          | 7 (20%)                            | 244                        | 34.9 (24.3)                                    |
| CA, Summer             | 32                          | 5 (15.6%)                          | 89                         | 17.8 (22.1)                                    |
| CA, Autumn             | 19                          | 2 (10.5%)                          | 256                        | 128 (7.1)                                      |
| CA, Winter             | 26                          | 1 (3.8%)                           | 6                          | 6 (0)                                          |
| <b>CA, All seasons</b> | <b>112</b>                  | <b>15 (13.4%)</b>                  | <b>595</b>                 | <b>39.7 (42.1)</b>                             |
| AM, Spring             | 11                          | 8 (72.7%)                          | 137                        | 17.1 (23.5)                                    |
| AM, Summer             | 75                          | 23 (30.7%)                         | 428                        | 18.6 (29.3)                                    |
| AM, Autumn             | 27                          | 15 (55.6%)                         | 3,044                      | 202.9 (185)                                    |
| AM, Winter             | 21                          | 17 (81%)                           | 5,067                      | 298.1 (500.3)                                  |
| <b>AM, All seasons</b> | <b>134</b>                  | <b>63 (47%)</b>                    | <b>8,676</b>               | <b>137.7 (296.5)</b>                           |
| LA, Spring             | 27                          | 14 (51.9%)                         | 211                        | 15.1 (23.1)                                    |
| LA, Summer             | 11                          | 7 (63.6%)                          | 40                         | 5.7 (3.7)                                      |
| LA, Autumn             | 7                           | 6 (85.7%)                          | 360                        | 60 (46.8)                                      |
| LA, Winter             | 13                          | 9 (69.2%)                          | 589                        | 65.4 (83.8)                                    |
| <b>LA, All seasons</b> | <b>58</b>                   | <b>36 (62.1%)</b>                  | <b>1,200</b>               | <b>33.3 (52.8)</b>                             |
| All sites, Spring      | 73                          | 29 (39.7%)                         | 592                        | 20.4 (24.3)                                    |
| All sites, Summer      | 118                         | 35 (29.7%)                         | 557                        | 15.9 (25)                                      |
| All sites, Autumn      | 53                          | 23 (43.4%)                         | 3,660                      | 159.1 (162.4)                                  |
| All sites, Winter      | 60                          | 27 (45%)                           | 5,662                      | 209.7 (412.4)                                  |
| <b>Total</b>           | <b>304</b>                  | <b>114 (37.5%)</b>                 | <b>10,471</b>              | <b>91.9 (226.9)</b>                            |

**Supplementary Table 2. Rat microsatellite loci.** The forward primers are listed first and all primers are 5' to 3'; Length refers to the length in bp of the region amplified by the given primer sequences as determined from Rnor 6.0 (1.7.2014) release of the *R. norvegicus* genome; Fluorophore indicates the fluorophore used to label forward primers and thus PCR products.

| <b>Locus</b> | <b>Primer sequences</b>                          | <b>Length</b> | <b>Fluorophore</b> | <b>Reference</b>               |
|--------------|--------------------------------------------------|---------------|--------------------|--------------------------------|
| D3Rat159     | CCAGGGATGAGTCCAAGGTA<br>CTGGTCTGCTTCCTCCAGTC     | 243           | VIC                | Steen <i>et al.</i> , 1999     |
| D4Rat59      | GCAGTGTGTTTGGGGTAGCT<br>GCGGAATGATAGTTACTACGGC   | 180           | FAM                | Steen <i>et al.</i> , 1999.    |
| D6Cebr1      | GGTTTGGTTGGGGAGAA<br>GTGCTGTCAGGGAAAGATGTA       | 223           | NED                | Giraudeau <i>et al.</i> , 1999 |
| D8Rat162     | TCACTGGCAGCAATTTACCA<br>TCTGAGACCTCTTCAACTCTGTTG | 249           | VIC                | Steen <i>et al.</i> , 1999.    |
| D10Rat105    | ATCCAGCCAGAAAGCAAAAC<br>CTGGCTGAGTCCTGTCACAA     | 100           | FAM                | Steen <i>et al.</i> , 1999.    |
| D12Rat42     | CAACCCAGTGTGTCAAACGT<br>GGGTTGGTGAAGCATTTTCA     | 128           | VIC                | Steen <i>et al.</i> , 1999.    |
| D14Rat110    | AACATTGTCTTGCTTAGCCTCA<br>CTCCACCCACACACCACG     | 280           | NED                | Steen <i>et al.</i> , 1999.    |
| D18Rat11     | GCCCAGGAGCTAAGTCTGATT<br>CCAGCCTCAGAGCCAATAAG    | 133           | FAM                | Steen <i>et al.</i> , 1999.    |
| D19Rat62     | GTGCTAATGTGGGTGGCTTT<br>TGAATTCTACCATGCATCACAG   | 112           | NED                | Steen <i>et al.</i> , 1999.    |



**Supplementary Table 3. Population genetics of rat microsatellite loci. A. Genetic diversity of loci.** Rats genotyped is the number of individual rats in which genotyping was successful; Allele number is the number of alleles identified at the locus; He and Ho are expected and observed heterozygosity, respectively; Site diversity is the proportion of allelic diversity that partitions within sites, as opposed to among sites, according to  $^S H_{UA}$ . Locus D12Rat42 was not used in analyses due to the low genotyping success rate. **B. HWE of loci.** Locus shows the loci; Site is the sampling site; Rats genotyped is the number of rats that were genotyped; Alleles is the number of alleles detected;  $X^2$  is the Chi-squared statistic testing whether the observed genotype frequencies match HWE expectations with the degrees of freedom (df) in parentheses. Those still significant after Bonferroni correction are shown in bold.

| <b>A.</b>    |                       |                      |           |           |                           |
|--------------|-----------------------|----------------------|-----------|-----------|---------------------------|
| <b>Locus</b> | <b>Rats genotyped</b> | <b>Allele number</b> | <b>He</b> | <b>Ho</b> | <b>Site diversity (%)</b> |
| D3Rat159     | 103                   | 14                   | 0.779     | 0.756     | 18                        |
| D4Rat59      | 105                   | 12                   | 0.822     | 0.652     | 8                         |
| D6Cebr1      | 109                   | 14                   | 0.752     | 0.356     | 13                        |
| D8Rat162     | 73                    | 15                   | 0.835     | 0.600     | 16                        |
| D10Rat105    | 112                   | 8                    | 0.696     | 0.617     | 13                        |
| D12Rat42     | 34                    | 9                    | 0.762     | 0.267     | NA                        |
| D14Rat110    | 83                    | 16                   | 0.824     | 0.529     | 18                        |
| D18Rat11     | 112                   | 10                   | 0.686     | 0.319     | 19                        |
| D19Rat62     | 96                    | 12                   | 0.678     | 0.462     | 13                        |

| <b>B.</b>        |             |                       |                |                              |                    |
|------------------|-------------|-----------------------|----------------|------------------------------|--------------------|
| <b>Locus</b>     | <b>Site</b> | <b>Rats genotyped</b> | <b>Alleles</b> | <b><math>X^2</math> (df)</b> | <b>Probability</b> |
| <b>D3Rat159</b>  | CA          | 45                    | 7              | 41.8 (21)                    | 0.01               |
|                  | LA          | 17                    | 11             | 89.9 (55)                    | 0.01               |
|                  | <b>AM</b>   | <b>41</b>             | <b>10</b>      | <b>98.4 (45)</b>             | <b>0.001</b>       |
| <b>D4Rat59</b>   | <b>CA</b>   | <b>46</b>             | <b>9</b>       | <b>74.6 (36)</b>             | <b>0.001</b>       |
|                  | LA          | 15                    | 9              | 39.1 (36)                    | 0.03               |
|                  | AM          | 44                    | 10             | 67.2 (45)                    | 0.05               |
| <b>D6Cebr1</b>   | <b>CA</b>   | <b>45</b>             | <b>11</b>      | <b>100.7 (55)</b>            | <b>0.001</b>       |
|                  | <b>LA</b>   | <b>18</b>             | <b>10</b>      | <b>87.6 (45)</b>             | <b>0.001</b>       |
|                  | <b>AM</b>   | <b>46</b>             | <b>6</b>       | <b>105.1 (15)</b>            | <b>0.001</b>       |
| <b>D8Rat162</b>  | <b>CA</b>   | <b>25</b>             | <b>10</b>      | <b>120.1 (45)</b>            | <b>0.001</b>       |
|                  | LA          | 13                    | 8              | 28.3 (28)                    | 0.45               |
|                  | AM          | 35                    | 10             | 67.7 (45)                    | 0.05               |
| <b>D10Rat105</b> | <b>CA</b>   | <b>47</b>             | <b>5</b>       | <b>89.6 (10)</b>             | <b>0.001</b>       |
|                  | <b>LA</b>   | <b>19</b>             | <b>6</b>       | <b>64 (15)</b>               | <b>0.001</b>       |
|                  | <b>AM</b>   | <b>46</b>             | <b>7</b>       | <b>94.2 (21)</b>             | <b>0.001</b>       |
| <b>D12Rat42</b>  | <b>CA</b>   | <b>15</b>             | <b>9</b>       | <b>71.8 (36)</b>             | <b>0.001</b>       |
|                  | LA          | 5                     | 4              | 12 (6)                       | 0.06               |
|                  | AM          | 14                    | 6              | 33.1 (15)                    | 0.01               |
| <b>D14Rat110</b> | <b>CA</b>   | <b>34</b>             | <b>11</b>      | <b>112.4 (55)</b>            | <b>0.001</b>       |
|                  | LA          | 16                    | 9              | 45.2 (36)                    | 0.14               |
|                  | <b>AM</b>   | <b>33</b>             | <b>11</b>      | <b>113.6 (55)</b>            | <b>0.001</b>       |
| <b>D18Rat11</b>  | <b>CA</b>   | <b>47</b>             | <b>8</b>       | <b>66.6 (28)</b>             | <b>0.001</b>       |
|                  | <b>LA</b>   | <b>19</b>             | <b>5</b>       | <b>34.5 (10)</b>             | <b>0.001</b>       |

|                 |           |           |          |                   |              |
|-----------------|-----------|-----------|----------|-------------------|--------------|
|                 | <b>AM</b> | <b>46</b> | <b>9</b> | <b>141 (36)</b>   | <b>0.001</b> |
| <b>D19Rat62</b> | <b>CA</b> | <b>39</b> | <b>9</b> | <b>115.2 (36)</b> | <b>0.001</b> |
|                 | LA        | 17        | 7        | 40.8 (21)         | 0.01         |
|                 | AM        | 40        | 5        | 17.9 (10)         | 0.06         |

**Supplementary Table 4. Isofemale lines of *S. rattii* that were whole genome sequenced.**

| <b>Isofemale line</b> | <b>Isolation year</b> | <b>Origin</b>    |
|-----------------------|-----------------------|------------------|
| ED36                  | 1990                  | Hampshire, UK    |
| ED43                  | 1989                  | Edinburgh, UK    |
| ED53                  | 1990                  | Kagoshima, Japan |
| ED132                 | 1990                  | Kagoshima, Japan |
| ED336                 | 1995                  | Berkshire, UK    |
| ED391                 | 1989                  | Wiltshire, UK    |
| ED399                 | 1989                  | Sussex, UK       |
| ED405                 | 1989                  | Sussex, UK       |
| ED428                 | 2012                  | Bath, UK         |
| ED438                 | 2012                  | Bath, UK         |

**Supplementary Table 5. dN/dS ratios of expansion clusters and their flanking regions.**

The dN/dS ratio for genes in expansion clusters and in parentheses the number of genes, N. We calculated dN/dS ratios by analysing parasites from clades 1 and 3 (**Figure 3**), treating each as separate populations.

| <b>Expansion cluster</b> | <b>Expansion cluster mean dN/dS ratio (N)</b> | <b>Flanking region mean dN/dS ratio (N)</b> |
|--------------------------|-----------------------------------------------|---------------------------------------------|
| <b>2</b>                 | 0.257 (1)                                     | 2.088 (2)                                   |
| <b>3</b>                 | 0.454 (5)                                     | 0.735 (6)                                   |
| <b>6</b>                 | 1.373 (1)                                     | 0.408 (1)                                   |
| <b>7</b>                 | 3.419 (2)                                     | 0.278 (3)                                   |
| <b>14</b>                | 0.322 (3)                                     | 1.242 (1)                                   |

**Supplementary Table 6. Sampling sites and times.**

| <b>Site (code)</b> | <b>Coordinates</b>         | <b>Type</b>              |
|--------------------|----------------------------|--------------------------|
| Cardiff (CA)       | 51°29'54"N 3°07'25"W       | Industrial               |
| Avonmouth (AM)     | 51°30'43"N 2°40'15"W       | Industrial               |
| Long Ashton (LA)   | 51°26'08"N 2°38'41"W       | Farm                     |
|                    |                            |                          |
| <b>Season</b>      | <b>Sampling start date</b> | <b>Sampling End date</b> |
| Spring             | 2.2017                     | 3.2017                   |
| Summer             | 6.2017                     | 6.2017                   |
| Autumn             | 9.2017                     | 11.2017                  |
| Winter             | 12.2017                    | 2.2018                   |

**SUPPLEMENTARY FIGURES**

**Supplementary Figure 1. Frequency distribution of the number of *S. ratti* infective larvae isolated from infected rat faecal pellets.** Uninfected pellets (N = 178) are not shown. The x-axis is in increments of 20 larvae, with only the upper limit shown, and only alternate increments labelled.

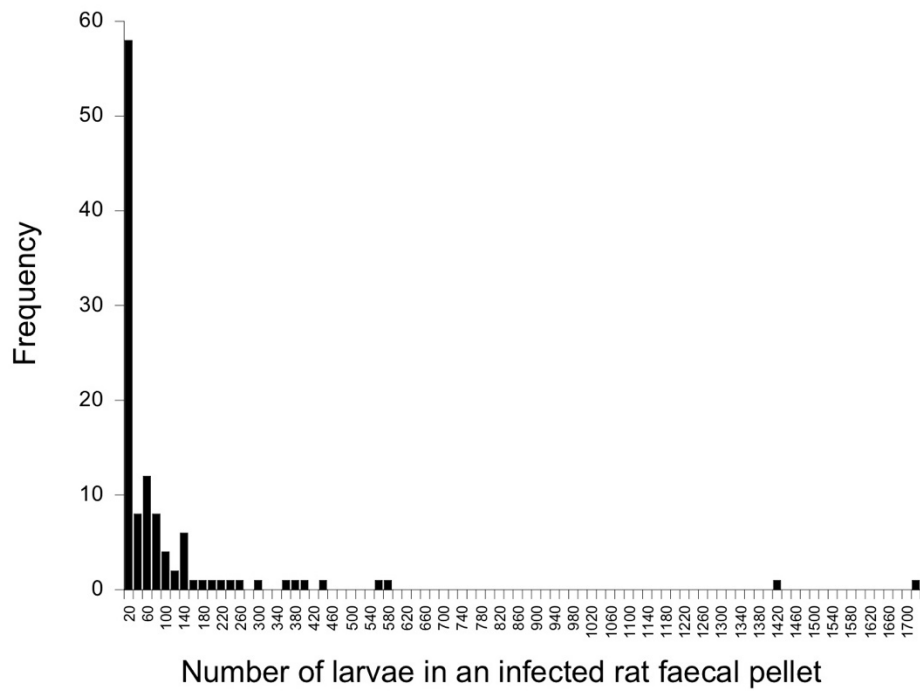

**Supplementary Figure 2. The distribution of  $F_{IS}$  values for all SNPs.** The x-axis is in 0.1 increments with only the lower (for negative) or higher (for positive) limits shown; category 0 is where  $F_{IS} = 0$ .

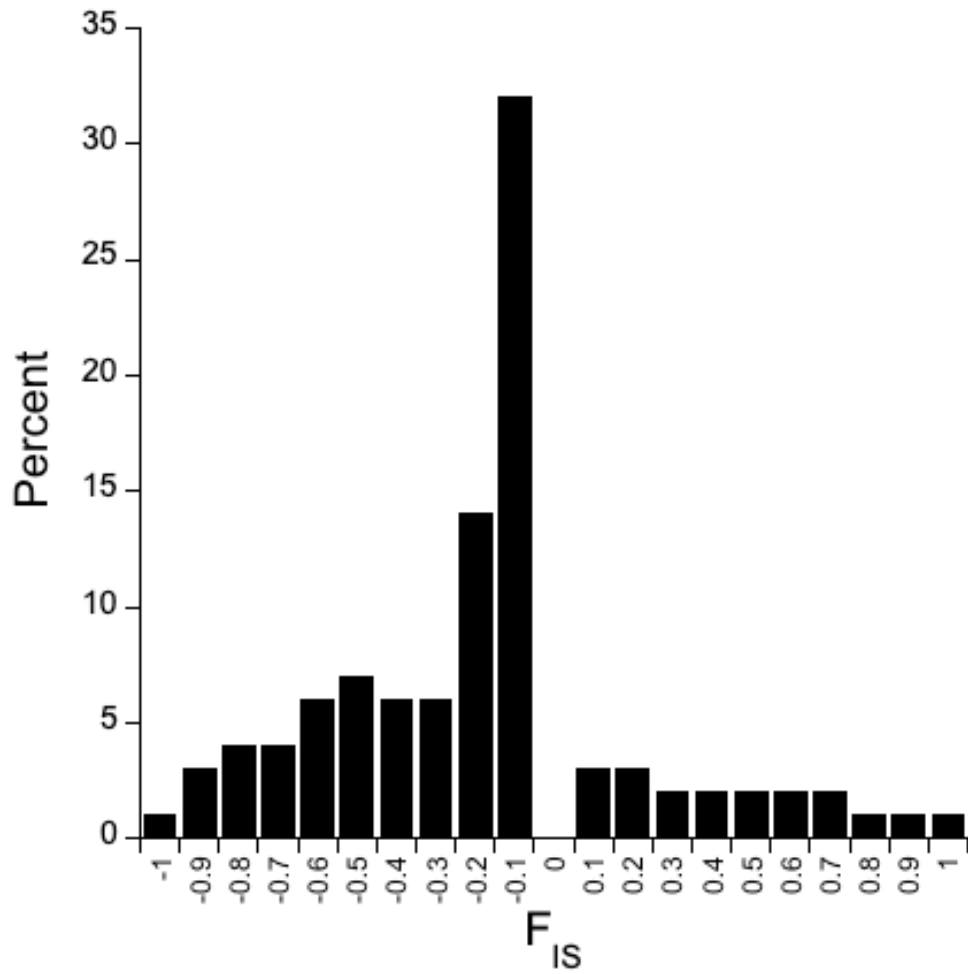

**Supplementary Figure 3. Histogram of  $\Phi$  relatedness values among 90 *S. rattii* larvae.**  
The x-axis is in increments of 0.05 with only the upper limit shown.

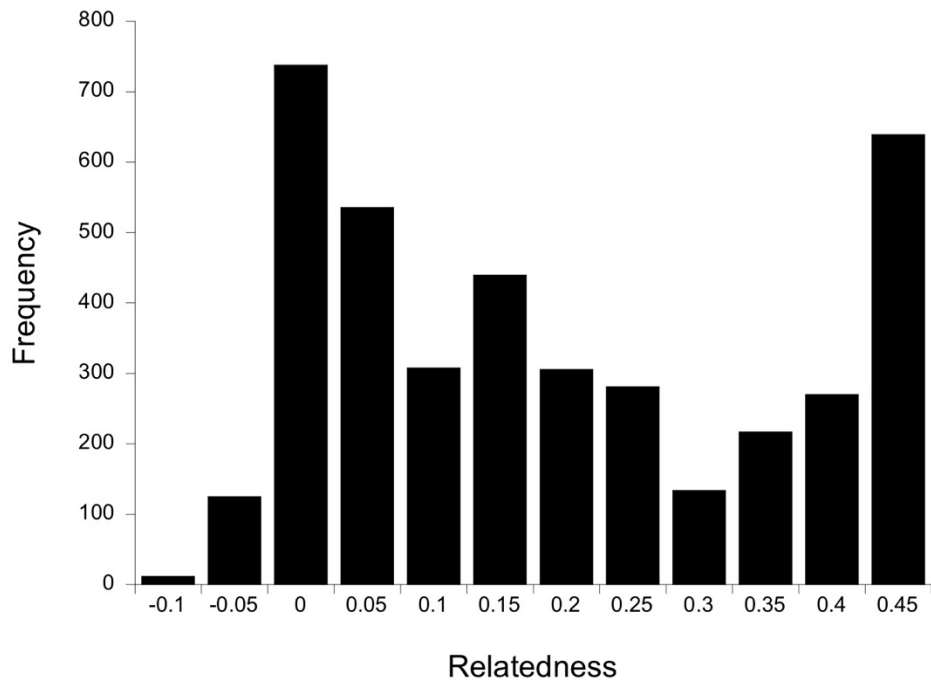



**Supplementary Figure 4. The frequency distribution of the pairwise number of SNP differences among the 90 parasites.** The x-axis is in categories of 10,000, save for the first three which are 0-1,000, 1,000-5,000, 5,000-10,000; in all the lower end of the range is shown. The frequency is 1 in the first category.

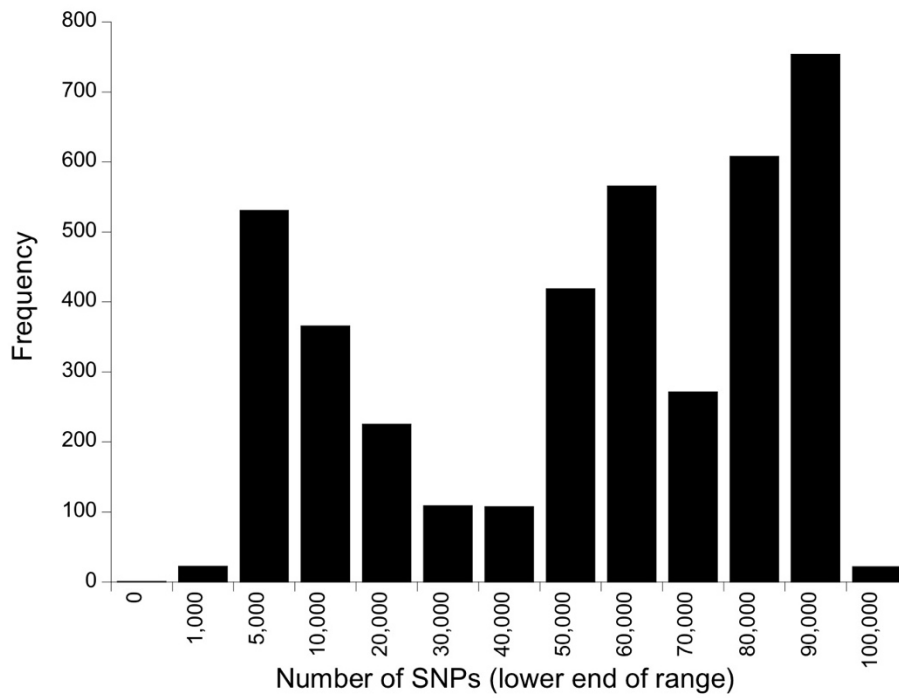

**Supplementary Figure 5. Maximum likelihood trees of the 90 parasites.** In each tree, the support for each node is shown, and the clade membership of the worm is shown by the coloured dots, which correspond to the neighbour-joining tree (Figure 3). Trees are calculated based on analysis of chromosome 1 only, part 1 of chromosome 2, part 2 of chromosome 2, part 1 of the X chromosome, and part 2 of the X chromosome. In all the scale bar is in units of substitutions per site.

### Chromosome 1

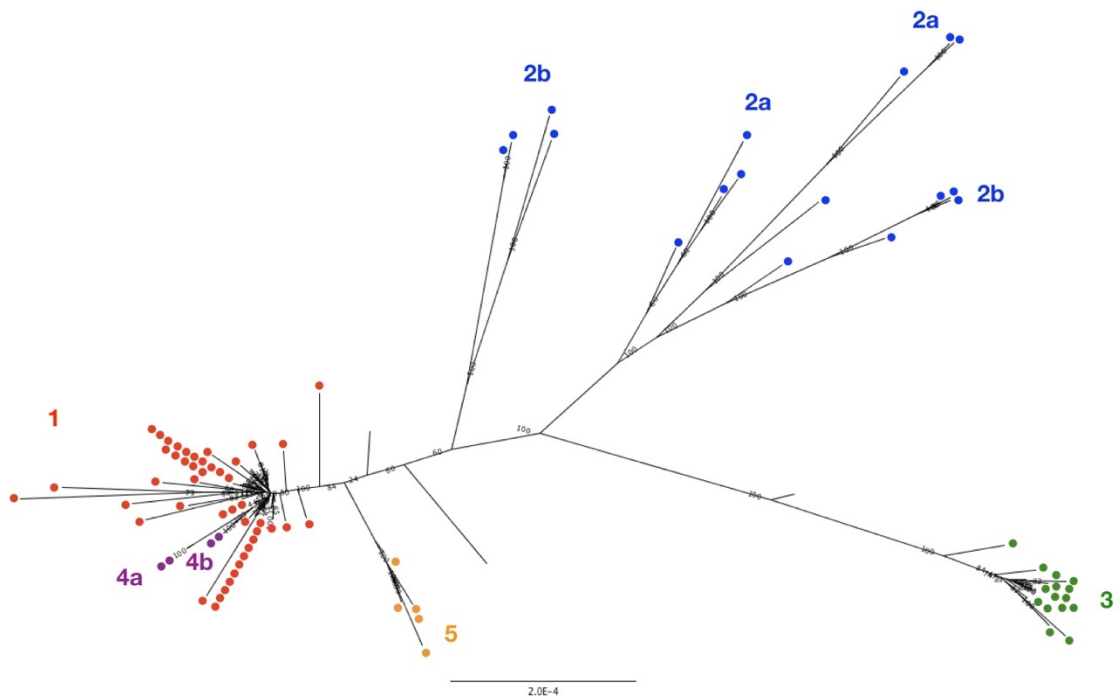

### Chromosome 2, part 1

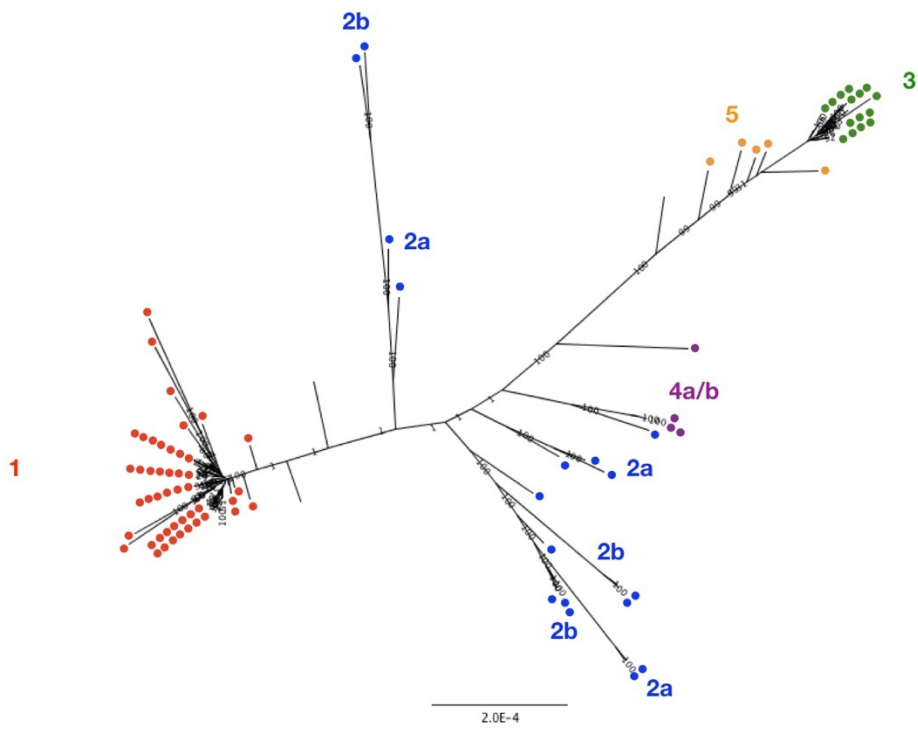

### Chromosome 2, part 2

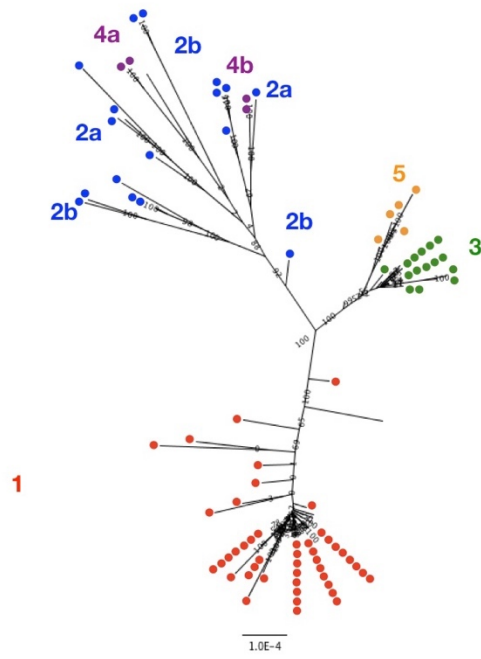

**Chromosome X, part 1**

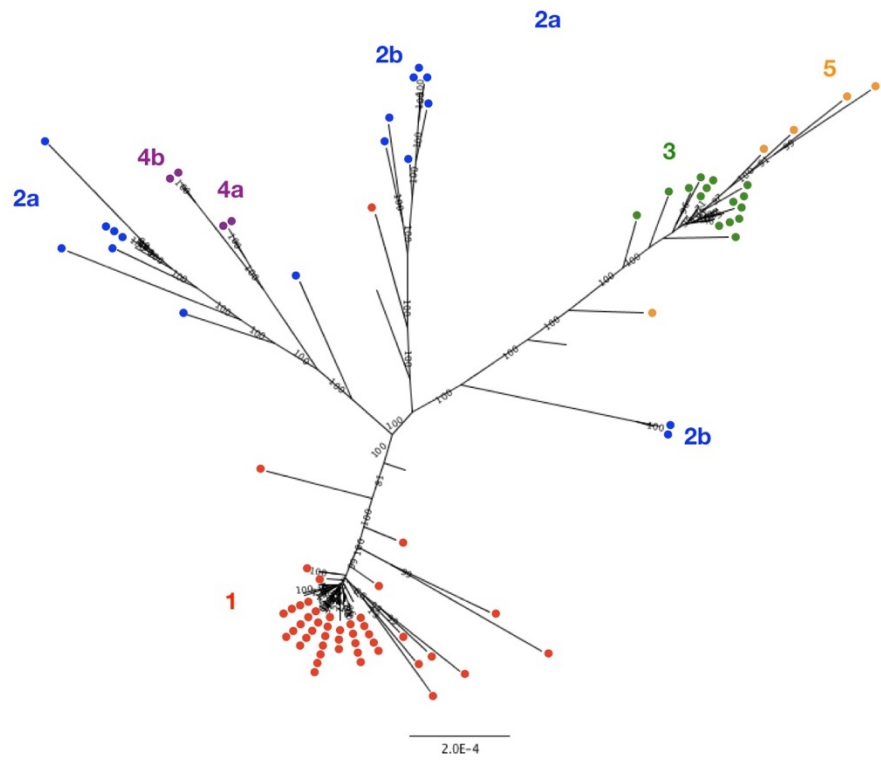

**Chromosome X, part 2**

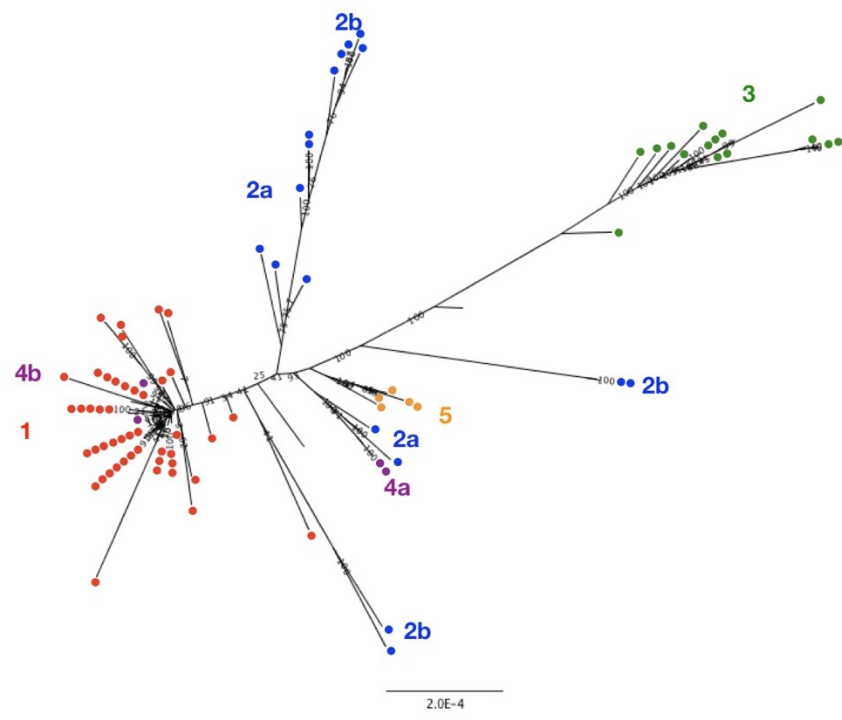

**Supplementary Figure 6. ADMIXTURE analysis of the 90 parasites.** The ADMIXTURE diagrams are shown for K = 2, 3, 4, 5 (with cross validation errors of 0.22965, 0.16255, 0.16335, 0.16136, respectively). For K = 6, only five groups are detected. All diagrams have the same right to left order of worms, which is shown in a Table at the end of the figure.

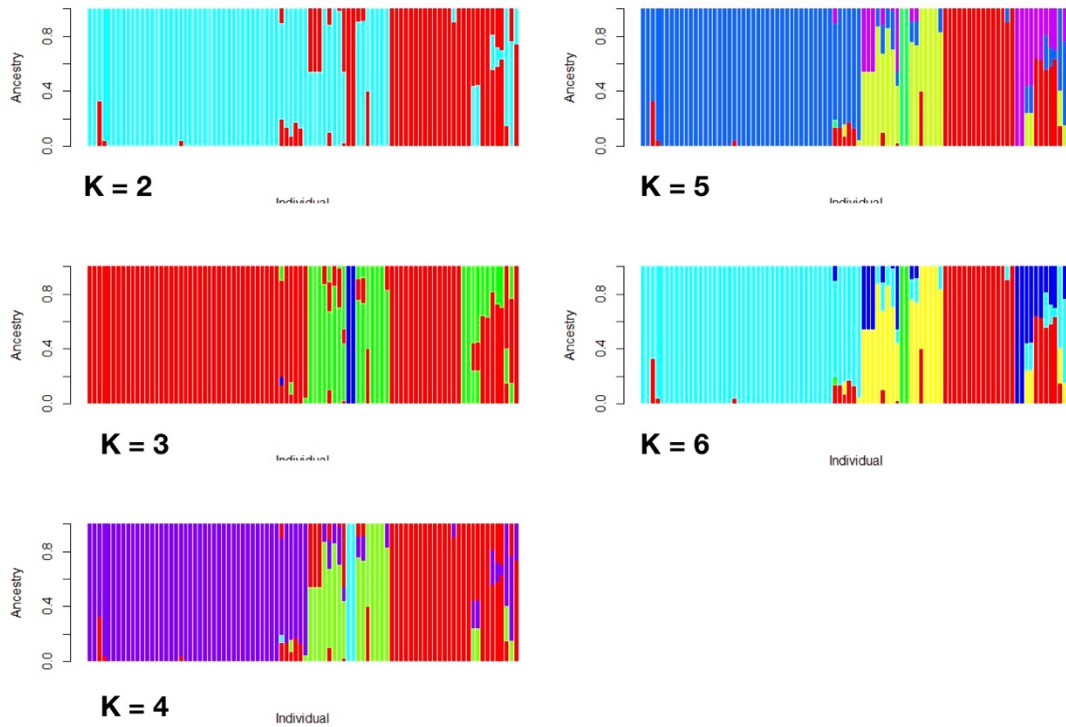

| Position in ADMIXTURE diagram | Worm designation | NJ tree clade membership |
|-------------------------------|------------------|--------------------------|
| Far left                      | CA273_8          | 1                        |
|                               | CA273_30         | 1                        |
|                               | CA275_47         | 1                        |
|                               | LA217_14         | 1                        |
|                               | LA219_13         | 1                        |
|                               | LA222_45         | 1                        |
|                               | LA223_8          | 1                        |
|                               | LA223_29         | 1                        |
|                               | LA14_5           | 1                        |
|                               | LA315_1          | 1                        |
|                               | LA315_4          | 1                        |
|                               | LA316_4          | 1                        |
|                               | LA316_5          | 1                        |
|                               | LA317_2          | 1                        |
|                               | LA319_5          | 1                        |

|  |          |    |
|--|----------|----|
|  | LA319_8  | 1  |
|  | AM99_8   | 1  |
|  | AM99_21  | 1  |
|  | AM100_37 | 1  |
|  | AM190_17 | 1  |
|  | AM194_1  | 1  |
|  | AM242_30 | 1  |
|  | AM252_62 | 1  |
|  | AM253_77 | 1  |
|  | AM280_49 | 1  |
|  | AM282_1  | 1  |
|  | AM282_67 | 1  |
|  | AM283_1  | 1  |
|  | AM283_2  | 1  |
|  | AM283_3  | 1  |
|  | AM283_4  | 1  |
|  | AM283_5  | 1  |
|  | AM284_59 | 1  |
|  | AM284_60 | 1  |
|  | AM284_61 | 1  |
|  | AM286_88 | 1  |
|  | AM286_92 | 1  |
|  | AM287_67 | 1  |
|  | AM288_1  | 1  |
|  | AM288_2  | 1  |
|  | AM291_93 | 1  |
|  | AM292_2  | 1  |
|  | AM293_2  | 1  |
|  | AM294_2  | 1  |
|  | AM296_4  | 1  |
|  | AM299_79 | 1  |
|  | CA338_1  | 2a |
|  | LA217_5  | 2a |
|  | LA319_3  | 2a |
|  | LA320_1  | 2a |
|  | AM245_61 | 2a |
|  | AM253_6  | 2a |
|  | AM287_65 | 2a |
|  | AM293_94 | 2b |
|  | CA273_38 | 2b |
|  | CA275_20 | 2b |
|  | CA338_4  | 2b |
|  | CA338_6  | 2b |
|  | LA320_11 | 2b |

|           |          |              |
|-----------|----------|--------------|
|           | AM99_31  | 2b           |
|           | AM100_35 | 2b           |
|           | AM100_50 | 2b           |
|           | AM294_4  | 2b           |
|           | CA273_10 | 3            |
|           | CA273_26 | 3            |
|           | CA275_11 | 3            |
|           | CA275_51 | 3            |
|           | LA315_3  | 3            |
|           | LA319_6  | 3            |
|           | LA320_5  | 3            |
|           | AM99_19  | 3            |
|           | AM99_30  | 3            |
|           | AM187_14 | 3            |
|           | AM258_25 | 3            |
|           | AM281_5  | 3            |
|           | AM282_63 | 3            |
|           | AM296_1  | 3            |
|           | AM298_2  | 3            |
|           | AM187_12 | 4a           |
|           | AM287_58 | 4a           |
|           | AM114_2  | 4a           |
|           | AM287_56 | 4a           |
|           | AM105_9  | 5            |
|           | AM280_56 | 5            |
|           | AM294_1  | 5            |
|           | AM295_1  | 5            |
|           | AM296_2  | 5            |
|           | AM292_3  | Not in clade |
|           | CA338_2  | Not in clade |
| Far right | AM296_5  | Not in clade |

**Supplementary Figure 7. Linkage disequilibrium in the *S. rattii* genome.** LD shown as  $r^2$  values. X1 and X2 are the largest and second largest X chromosome scaffolds, respectively.

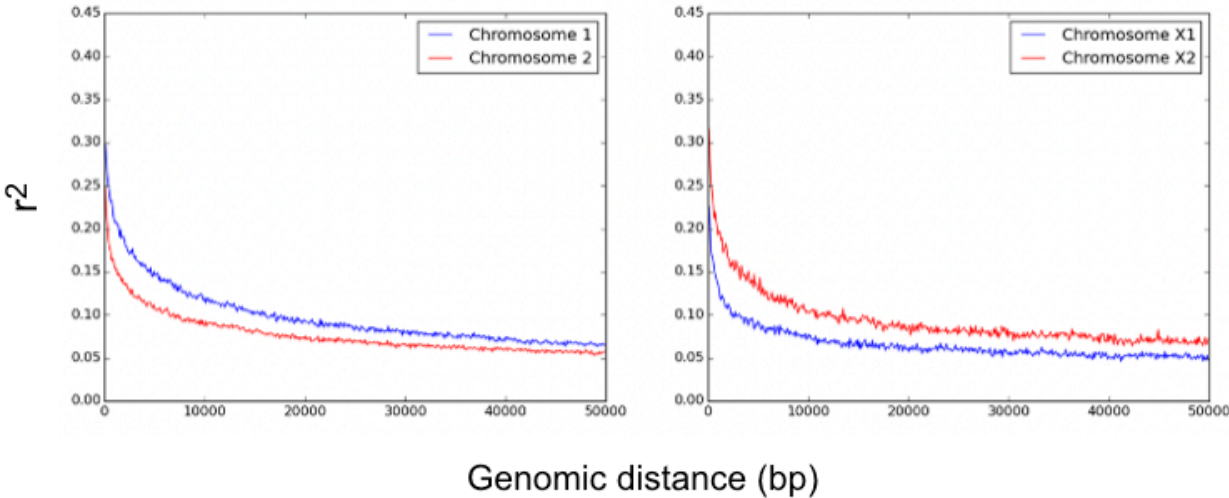



**Supplementary Figure 8. Linkage disequilibrium in the *S. ratti* genome for clade 1 and 3 parasites.** LD is shown as  $r^2$  values for (A) clade 1 and (B) clade 3 parasites. X1 and X2 are the largest and second largest X chromosome scaffolds, respectively.

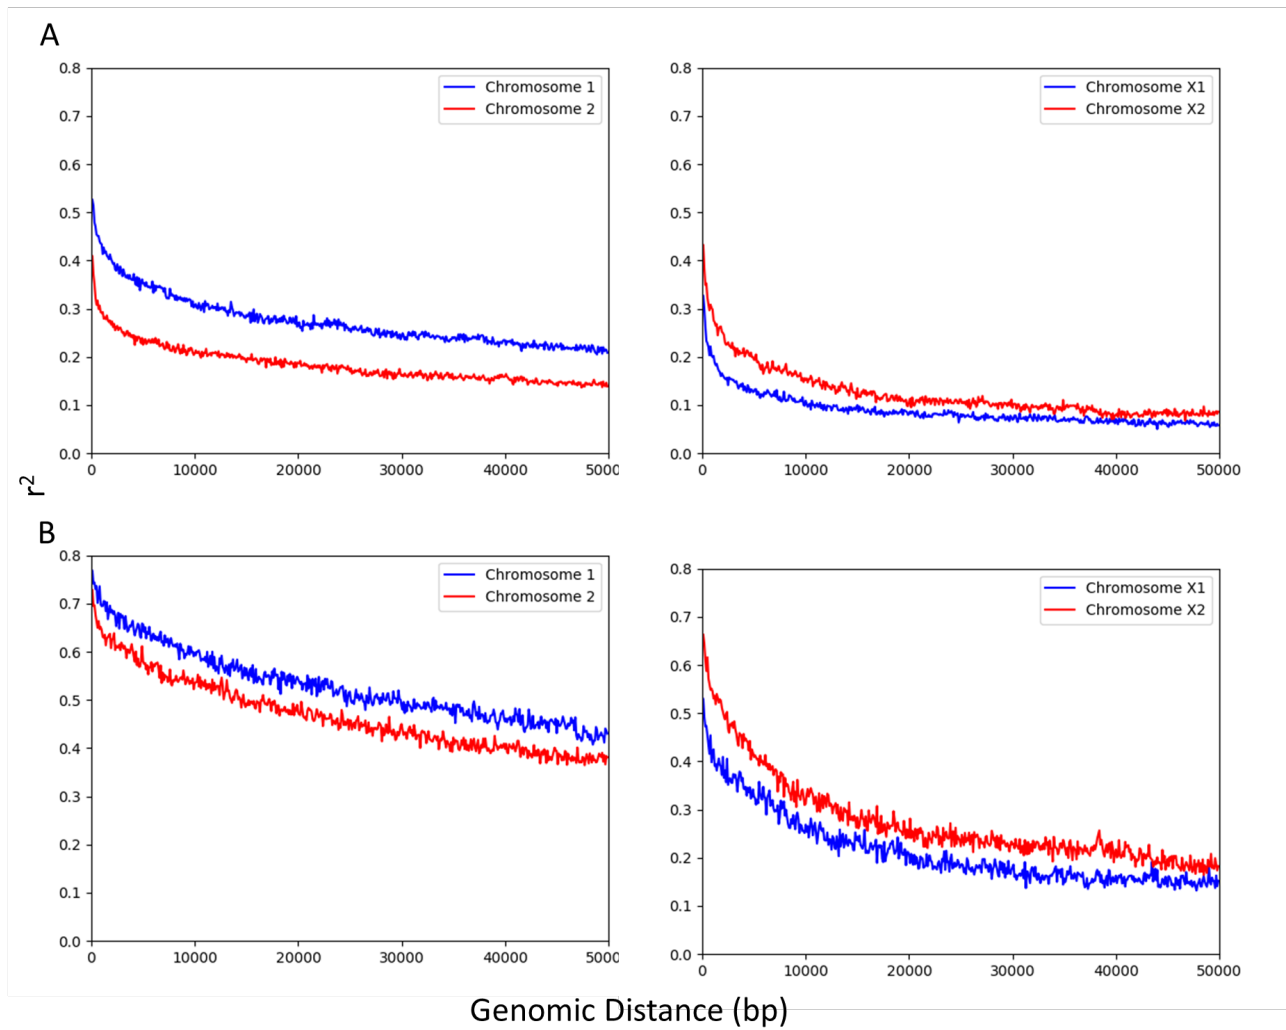

**Supplementary Figure 9. Heatmaps of linkage disequilibrium in the *S. ratti* genome for clade 1 and 3 parasites.** LD is shown as  $r^2$  values on a coloured scale for (A) clade 1 and (B) clade 3. X1 and X2 refer to the largest and second largest scaffolds of the X chromosome, respectively. The inserts enlarge regions to show areas of high LD.

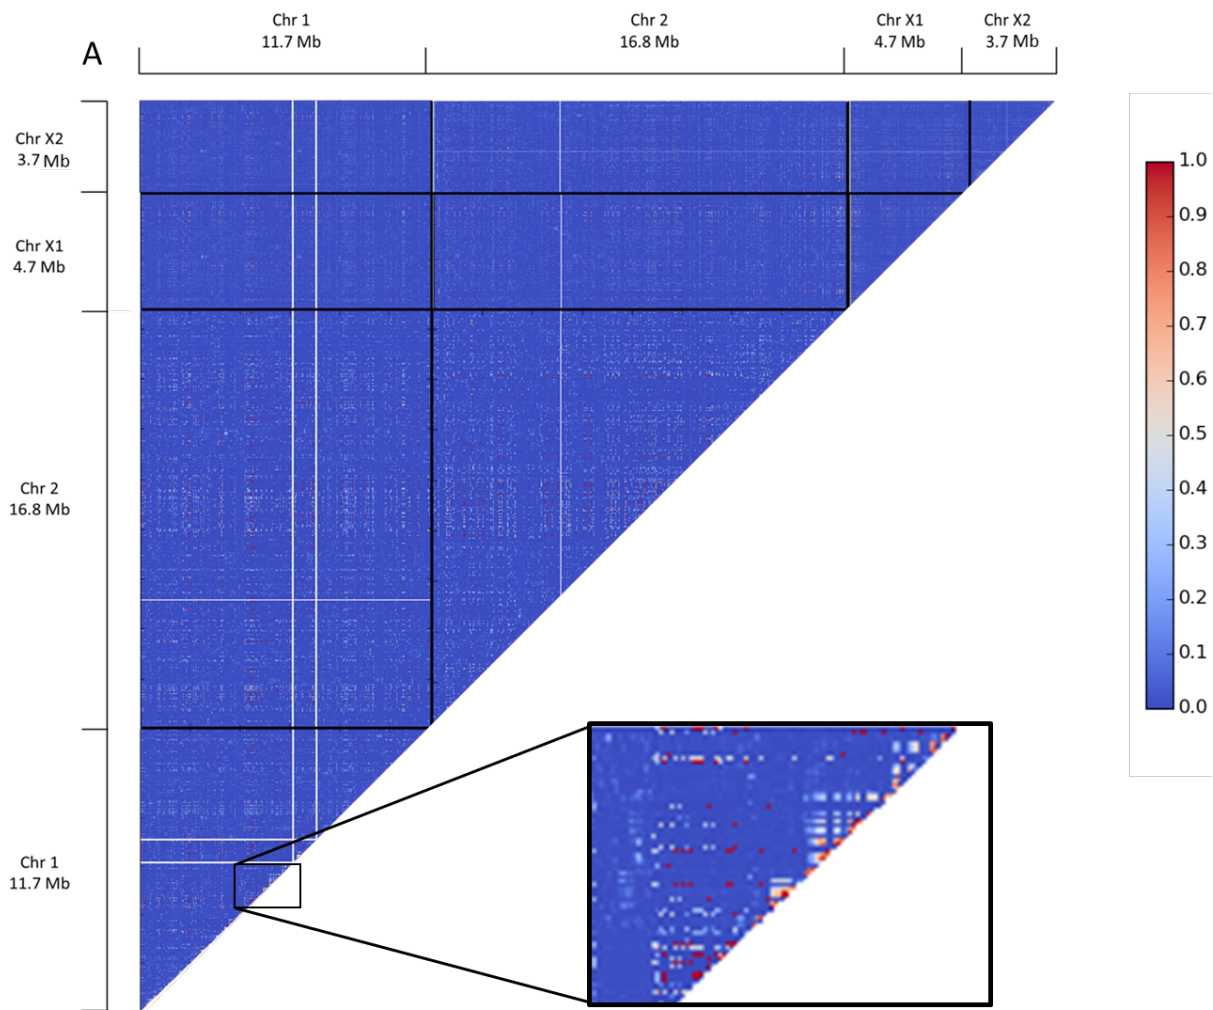

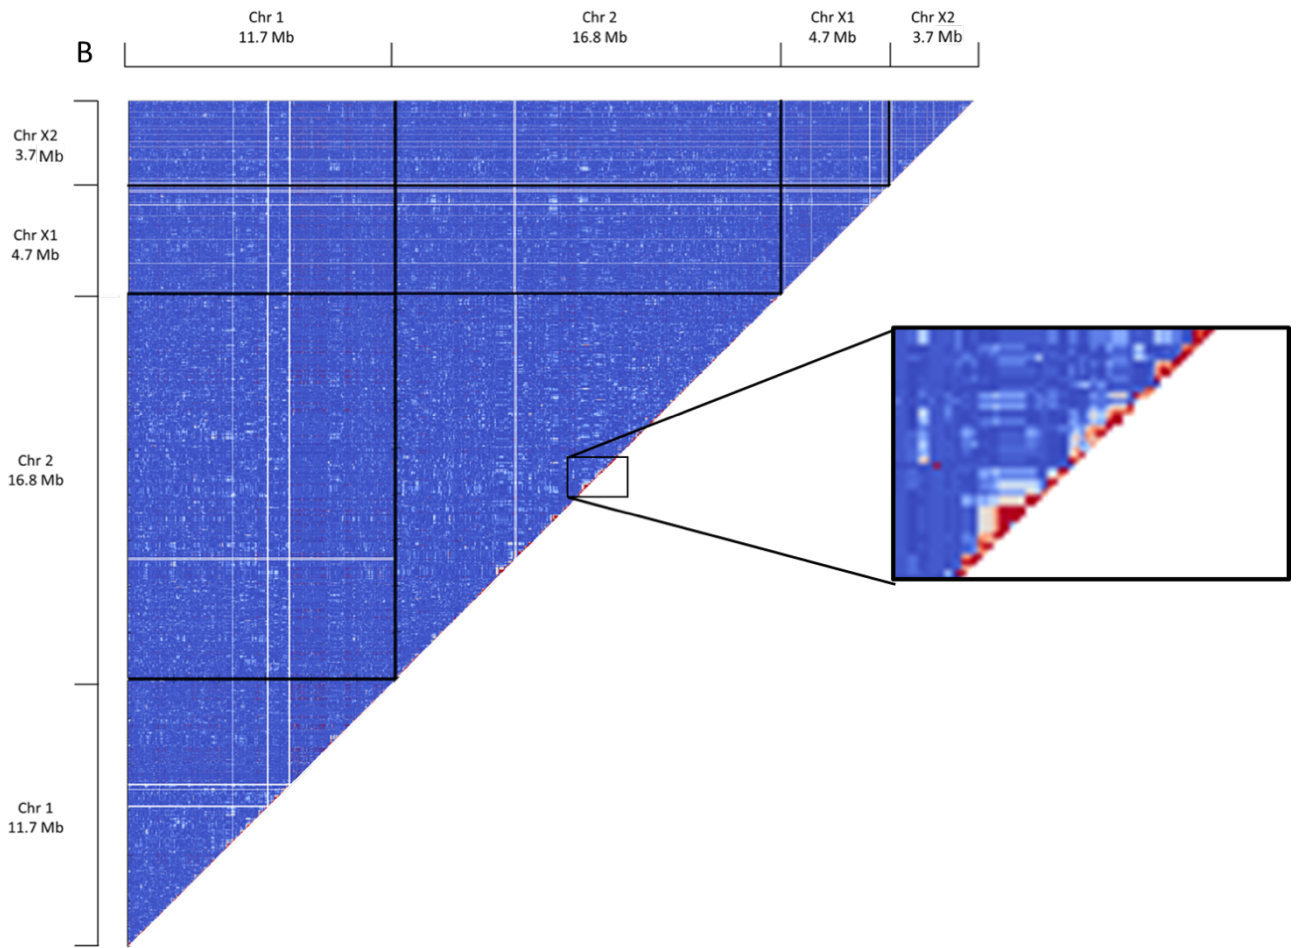

**Supplementary Figure 10. Heatmaps of linkage disequilibrium in the *S. rattii* genome.** Phasing of genotypes was carried out by Beagle (above the diagonal) or Shapeit (below the diagonal). X1 and X2 refer to the largest and second largest scaffolds of the X chromosome, respectively. Vertical and horizontal white lines in chromosome 1 represent two megabase long tracts of Ns that separate the three X chromosome scaffolds, whose genomic order is not known.

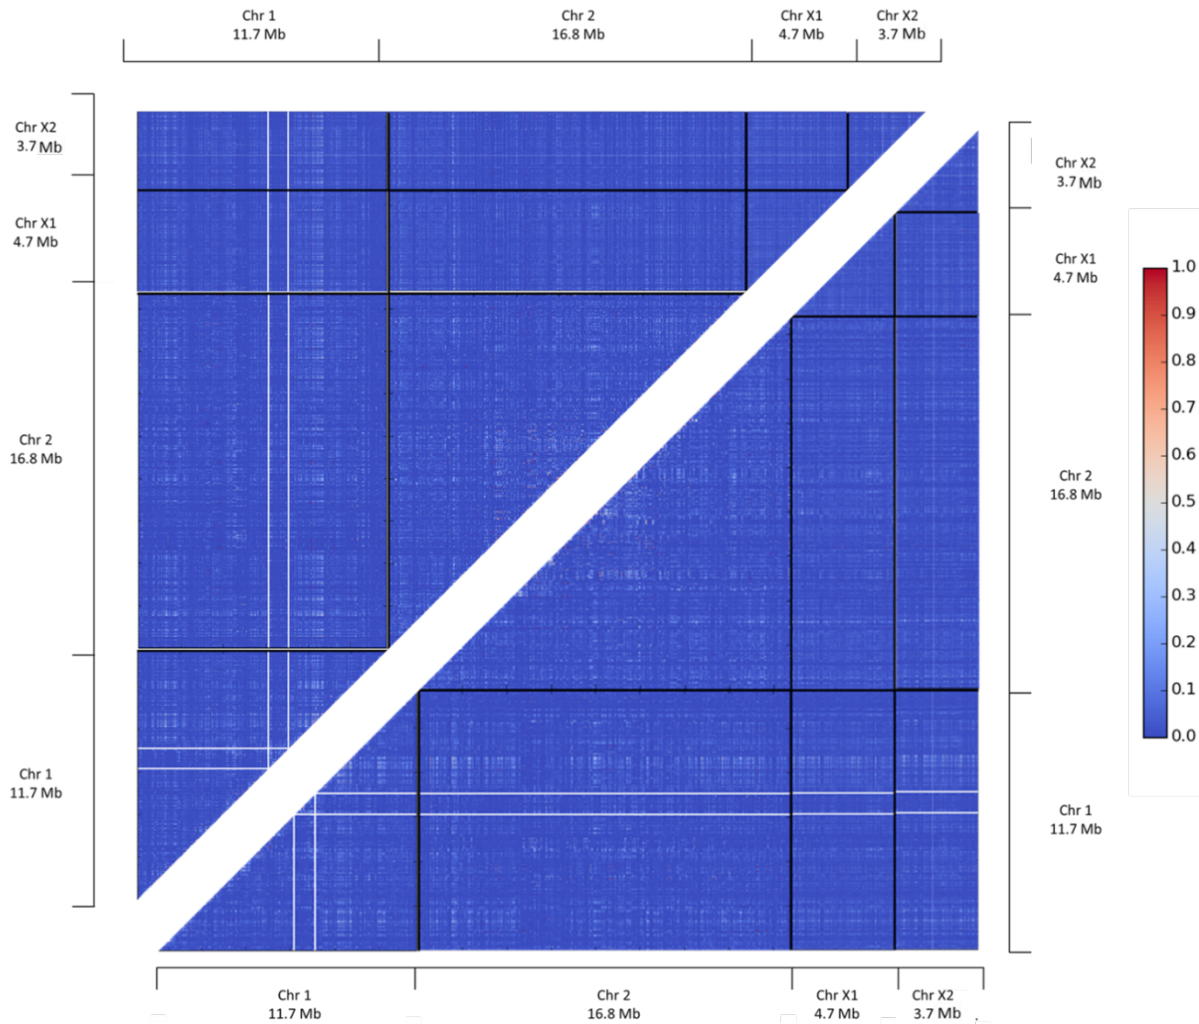

**Supplementary Figure 11. Model of clade ancestry.** There is a common ancestor of all parasites. From this ancestor there are then comparatively few generations of asexual reproduction, and so comparatively few mutations, leading to the ancestor of each clade. This is shown as Clade 1's common ancestor having a red mutation, Clade 3's common ancestor a blue mutation. Each clade then has, comparatively, many generations of asexual reproduction and many mutations are acquired. Considering LD, there will high LD among genotypes of Clade 1, and high LD among genotypes of Clade 3, but the LD of all Clade 1 and 3 genotypes together will be comparatively lower.

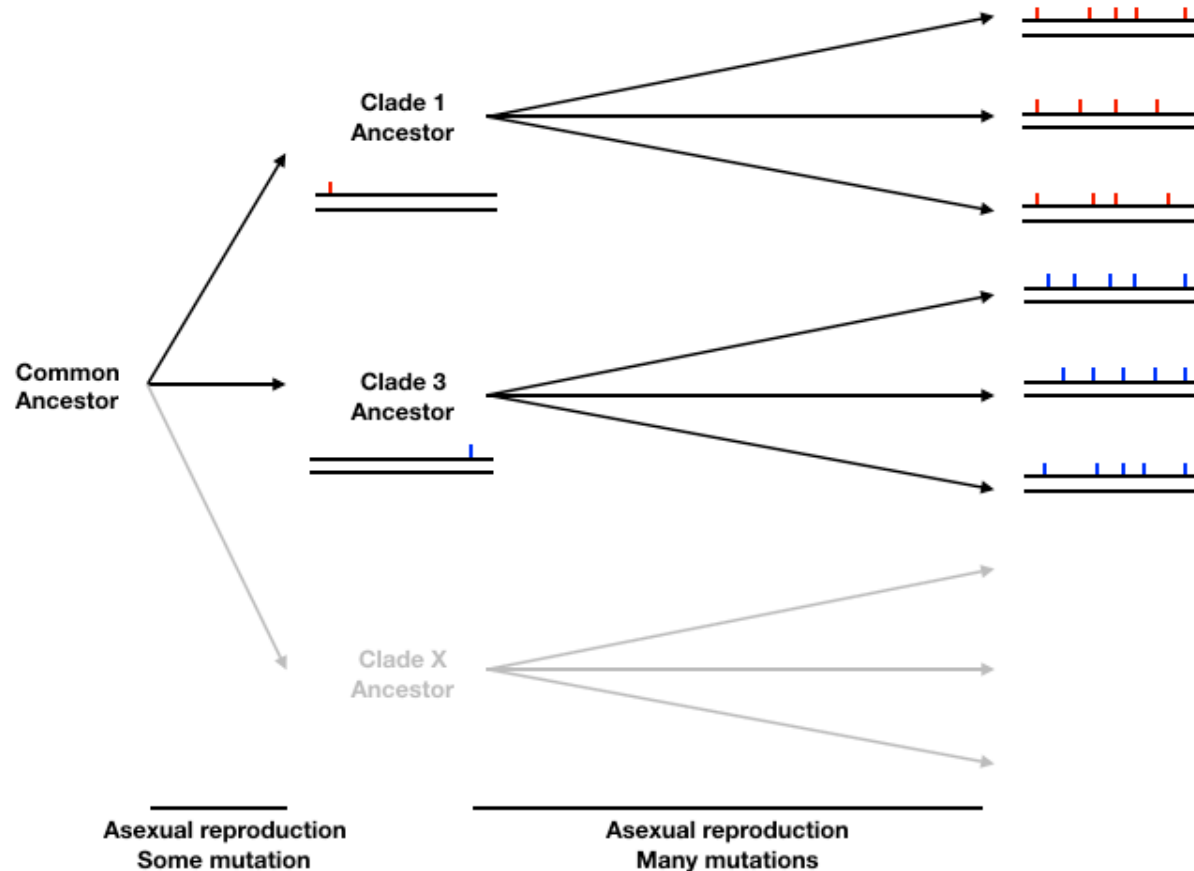

**Supplementary Figure 12. PCA analysis of *S. rattii* parasites.** Projections of principal components (PC) 1 and 2 of the 90 parasites from the three samples sites and the 10 isofemale lines, where PCs 1 and 2 explained 91% of the variance. Individuals are coloured according to (A) sampling site and (B) neighbour-joining dendrogram clades (**Figure 3**) with the colour coding scheme shown in each panel.

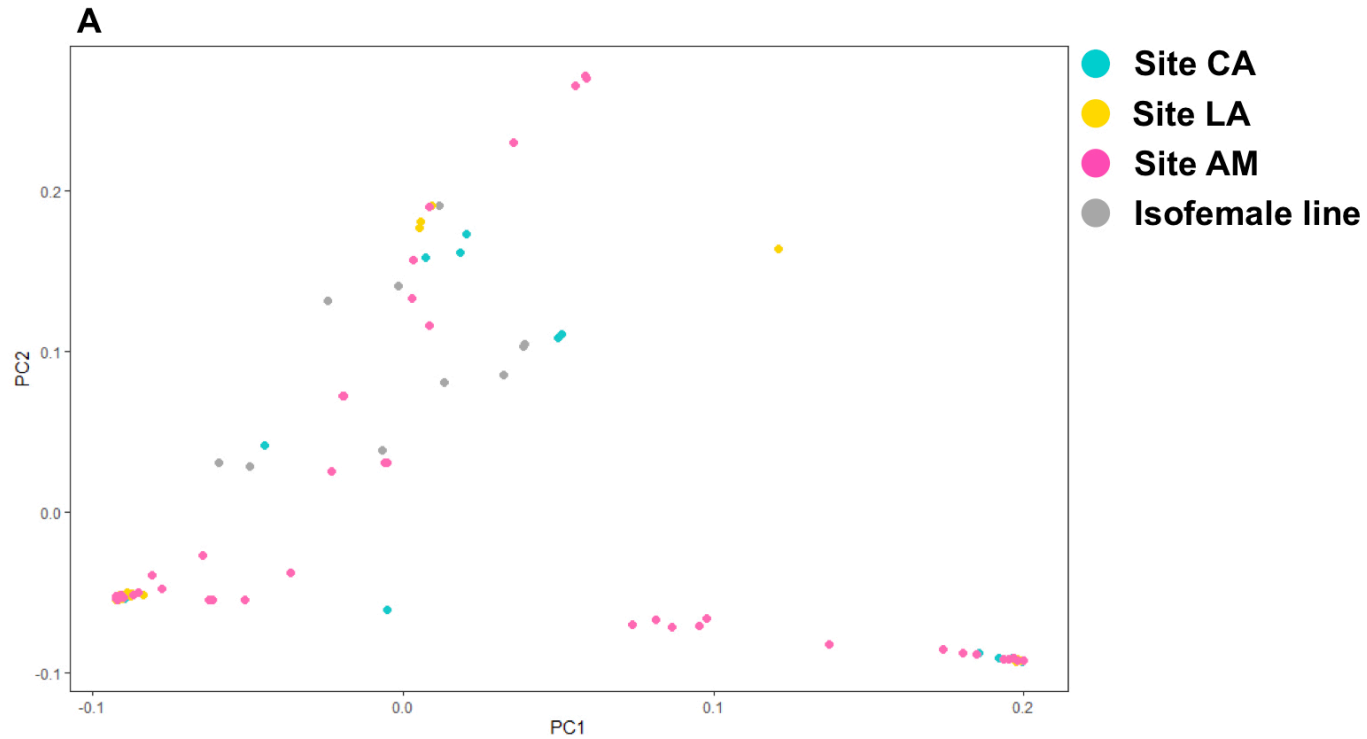

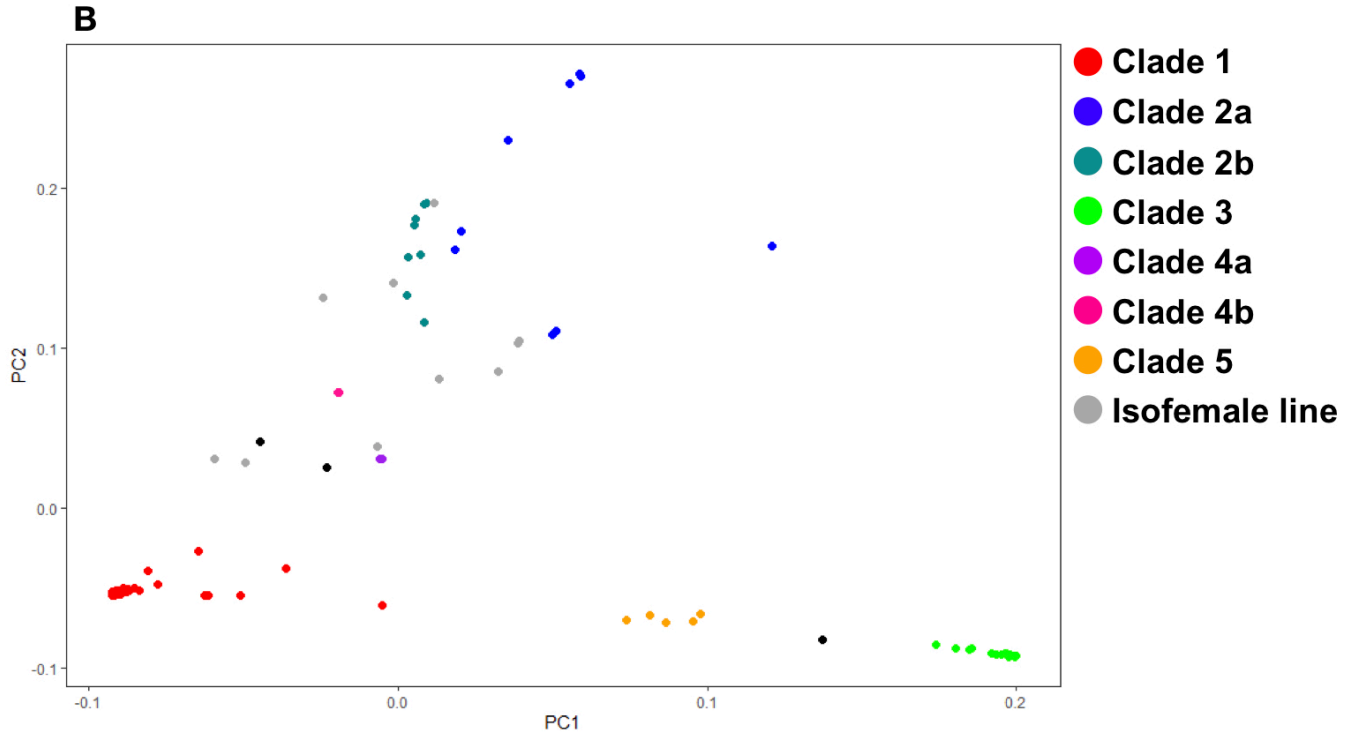

**Supplementary Figure 13. Minimum spanning *S. ratti* mitochondrial haplotype maps.** Individual pellets are shown by their sampling site (AM, CA, LA) and the number preceding the underscore; the number after the underscore is the unique identifier of that worm. Haplotypes represented by multiple individuals are denoted by single letters. Four mitochondrial clades (A – D) are evident. Individual worms are coded either by the sampling site from which they were obtained or by the nuclear clade to which they belong (**Figure 3**). Mitochondrial clades A, B and C contained individuals from all 3 sampling sites, though at different rates. Mitochondrial clade A contains all individuals from nuclear clades 3 and 5 as well as one individual from nuclear clade 2b. Mitochondrial clade B contains individuals from nuclear clades 1, 2a and 4b. Mitochondrial clade C contains only individuals from nuclear clade 2b. The two individuals of nuclear clade 4a appear as intermediate between mitochondrial clades B and C in the haplotype map and so are designated as minor mitochondrial clade D.



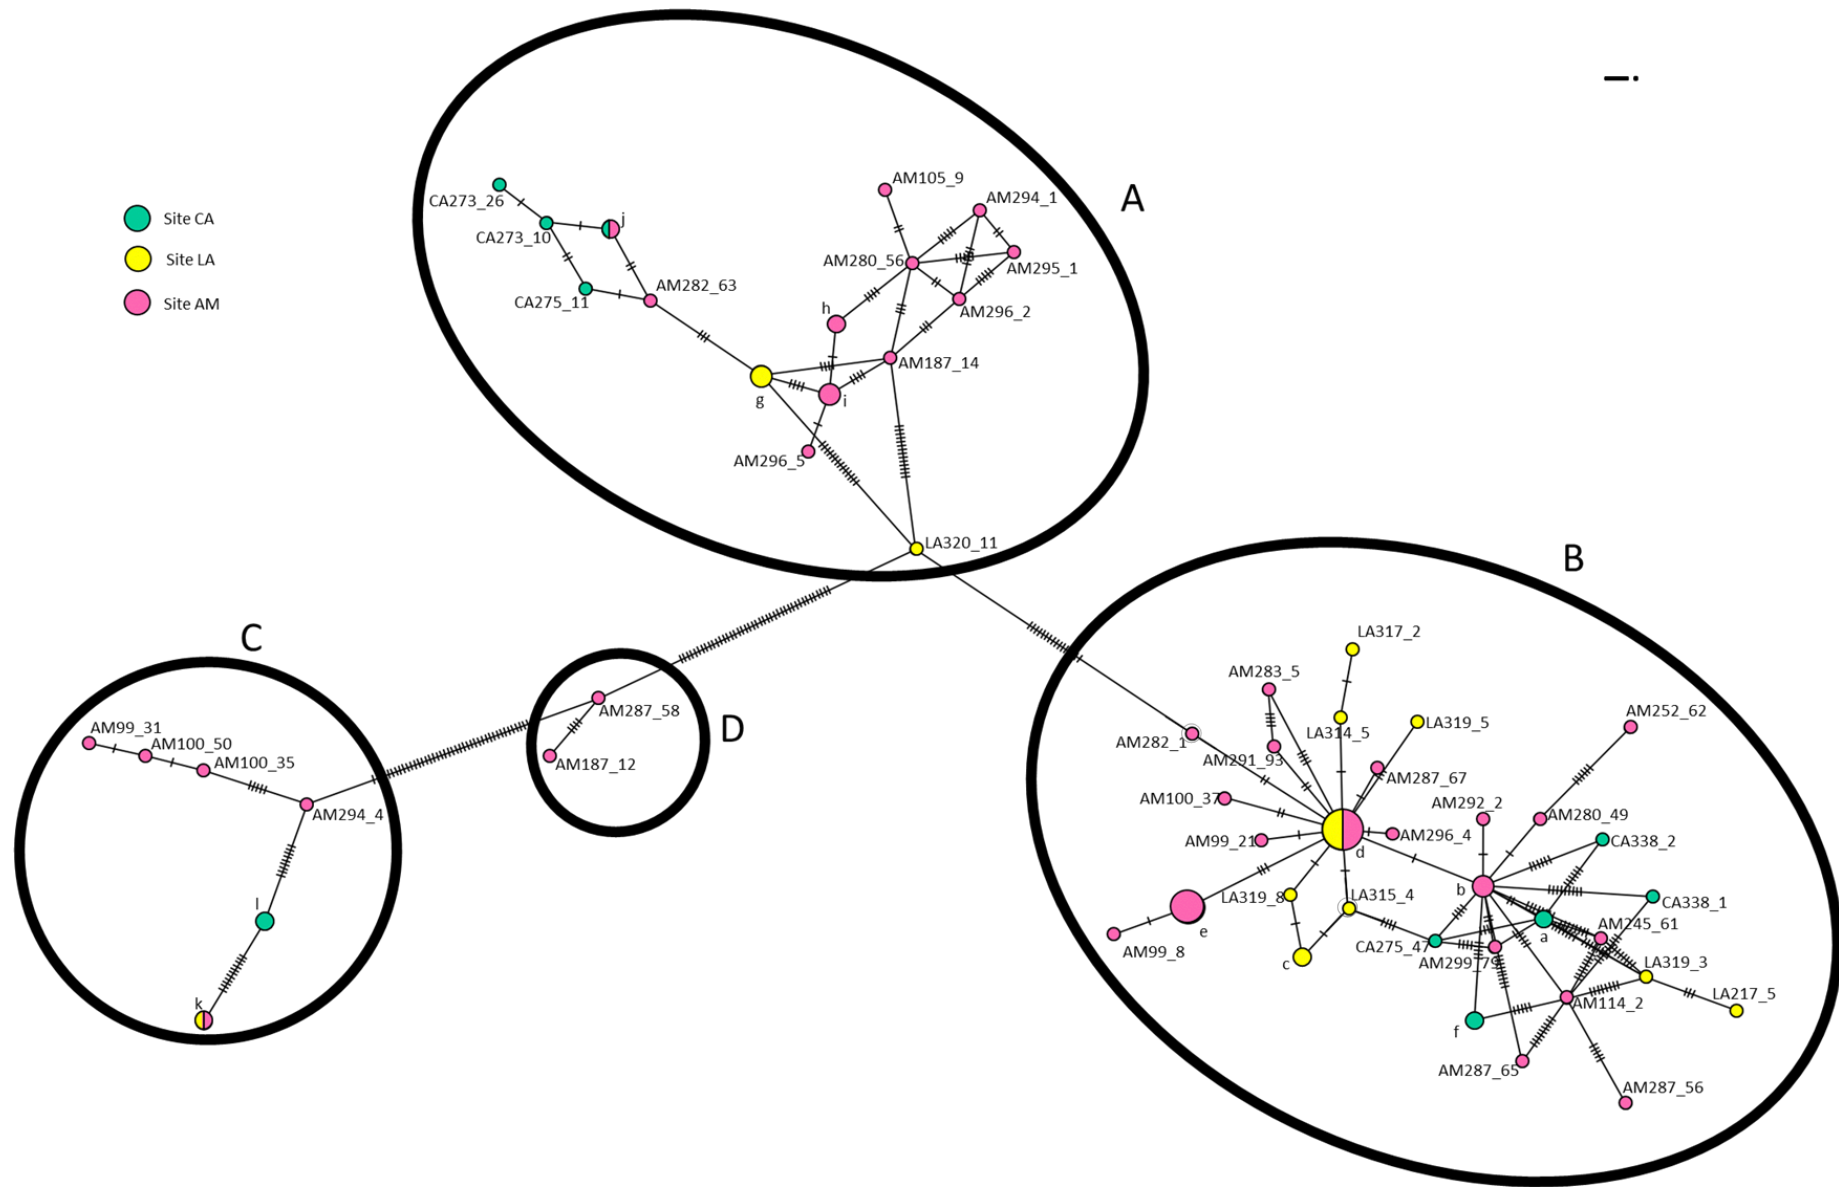

≡

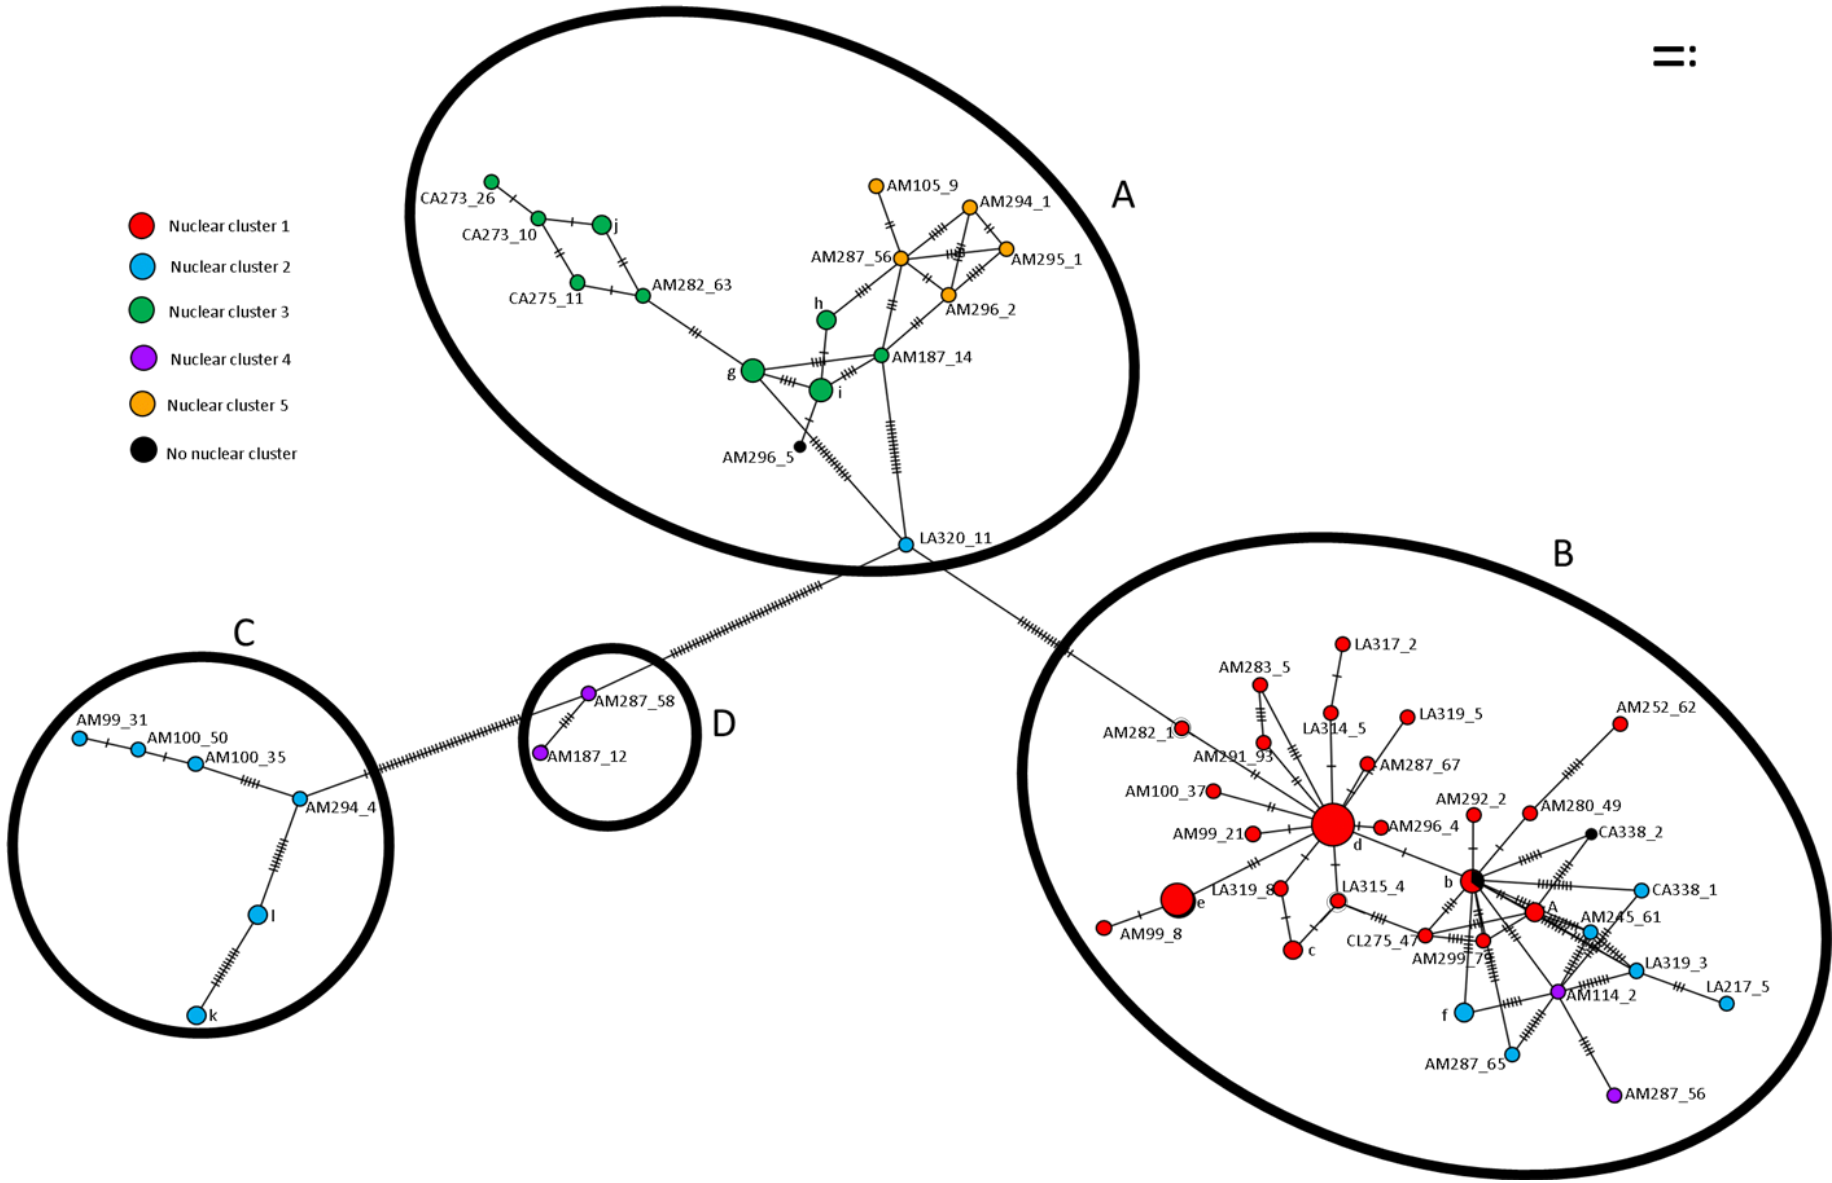

**Supplementary Figure 14. Ritland and Lynch pairwise relatedness values of rats within sampling sites.** The x-axis is in increments of 0.1, with only the upper limit shown. At each site there is a right-hand skew to these distributions; Shapiro-Wilkes test for normality statistics  $W = 0.89$  for site AM,  $W = 0.9$  for site CA and  $W = 0.87$  for site LA,  $P > 0.0001$  in all cases.

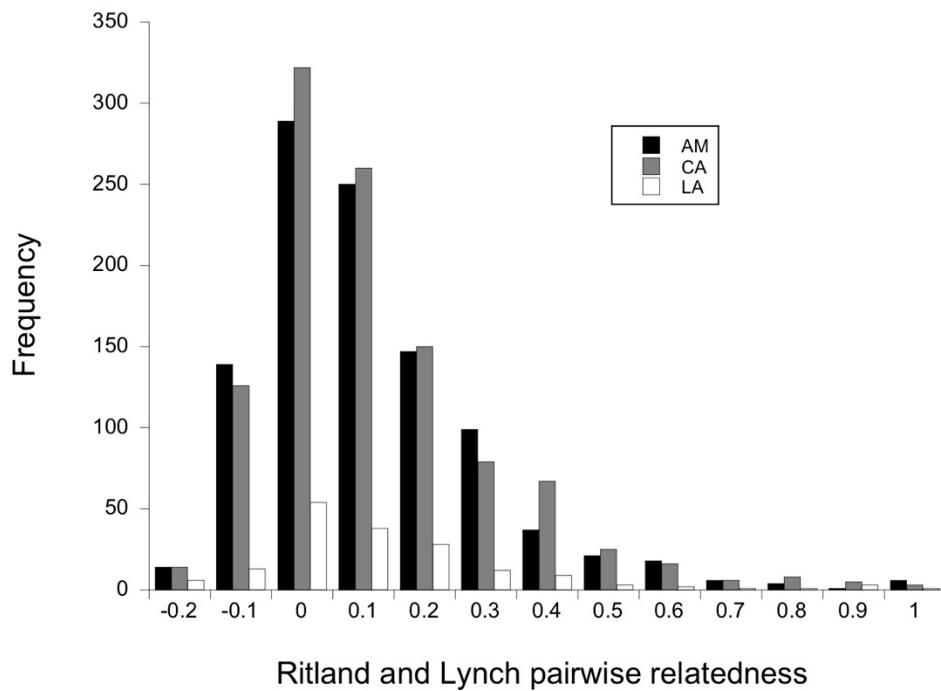

**Supplementary Figure 15. *S. ratti* neighbour-joining dendrograms of 10 isofemale lines and 90 larvae collected from the three sample sites.** Isofemale lines are prefixed by ED (Supplementary Table 4). Five of the isofemale lines (derived from parasites collected from the southern UK in 1989-90, and Japan in 1990) are within clade 2b, which is the most diverse of the clades, but the other 5 isofemale lines are in clades 1, 2a and 4.

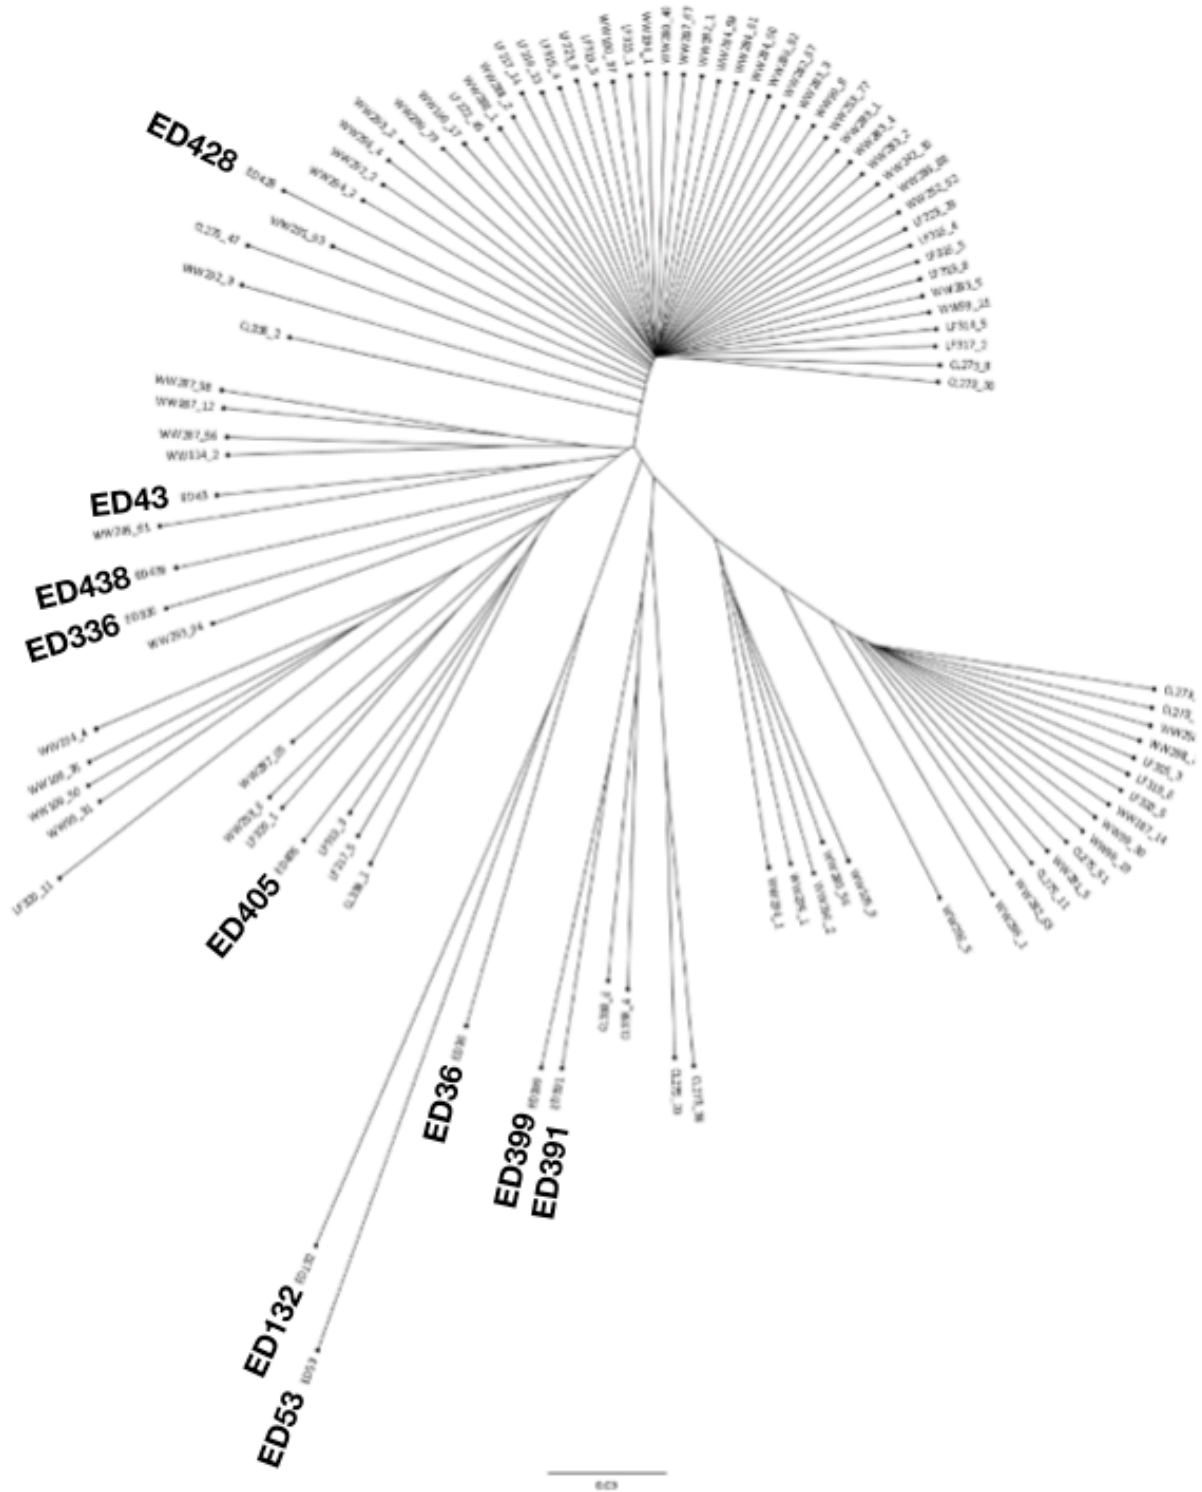

**Supplementary Figure 16. The distribution of SNPs across the *S. ratti* genome.** The distribution of SNPs for all 90 parasites for discrete, 10 kb windows, each represented by a vertical bar, for chromosomes 1, 2 and the two scaffolds of the X chromosome.

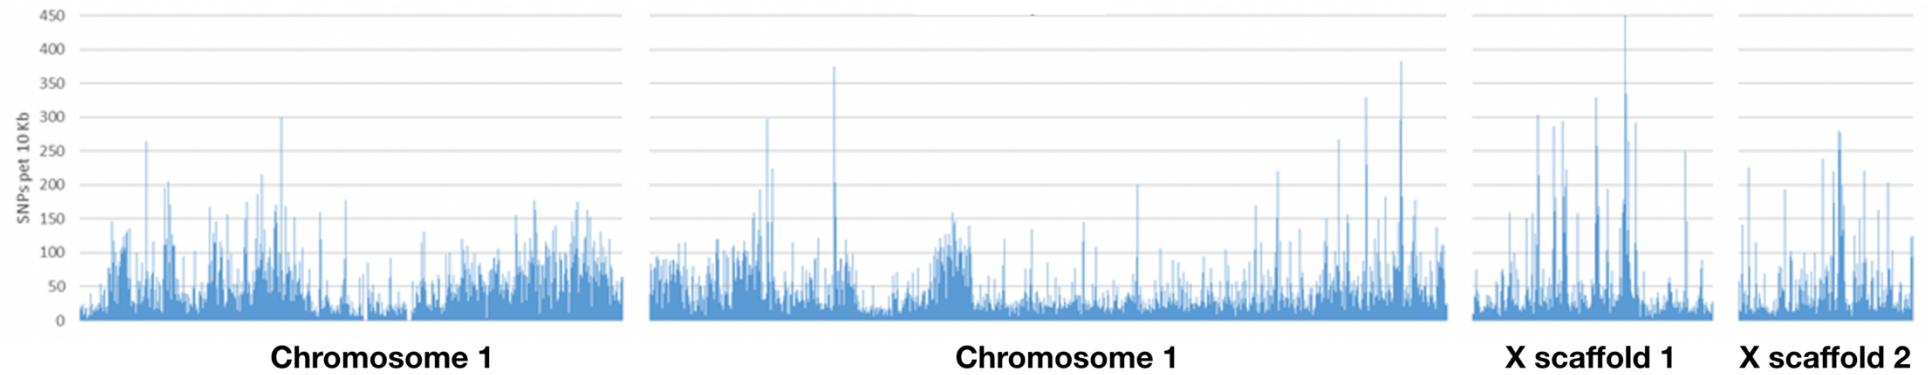

**Supplementary Figure 17. Neighbour-joining dendrograms based on five expansion clusters.** Clusters, 6, 7, 8, 12 and 14 are the clusters from which no genes were excluded due to concerns about genome assembly. Each tree was calculated based on the entire sequence from the start to the end of each cluster (excluding flanking regions). Clades (1 – 5) and sub-clades (2a and 2b, 4a and 4b) are defined based on the whole genome dendrogram (**Figure 3**). Individual parasites are marked with circles coloured according to their (sub-)clade in the whole genome dendrogram. Branch lengths are relative such that the distance between the two most distant individuals is 1, and so absolute distance differs among the panels.

**Expansion Cluster 6**

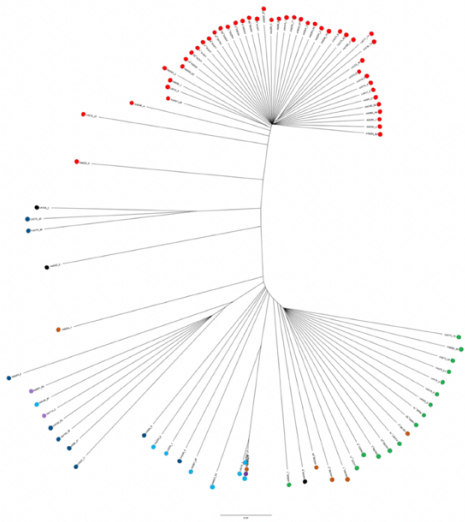

**Expansion Cluster 7**

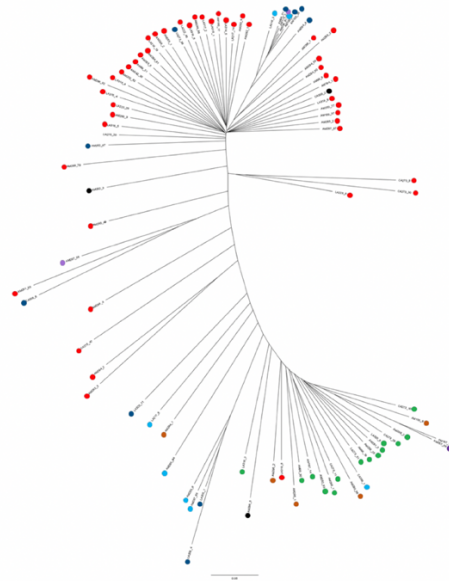

**Expansion Cluster 8**

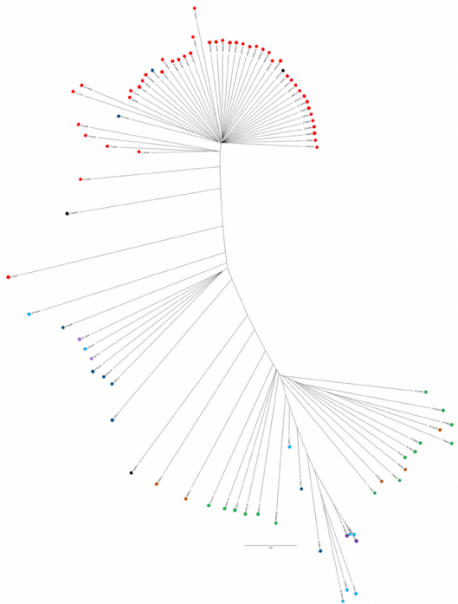

**Expansion Cluster 12**

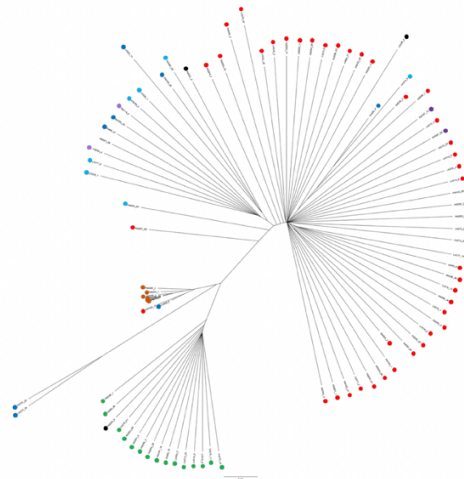

**Expansion Cluster 14**

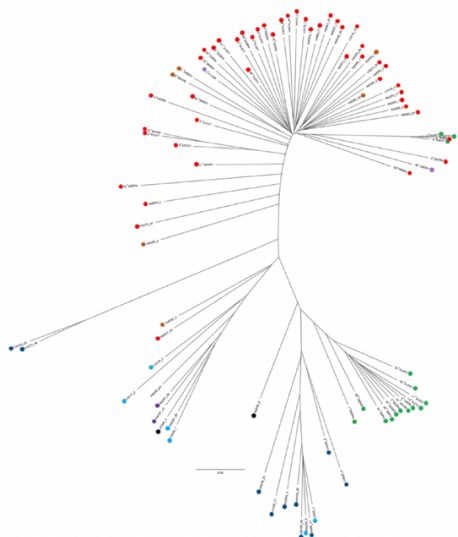

**Supplementary Figure 18. Correlation of read depth and GC content for 90 *S. ratti* larvae.** GC content is measured in non-overlapping 10 kb regions. Correlation  $\rho = 0.783$ ,  $df = 4,008$ ,  $P < 0.00001$ .

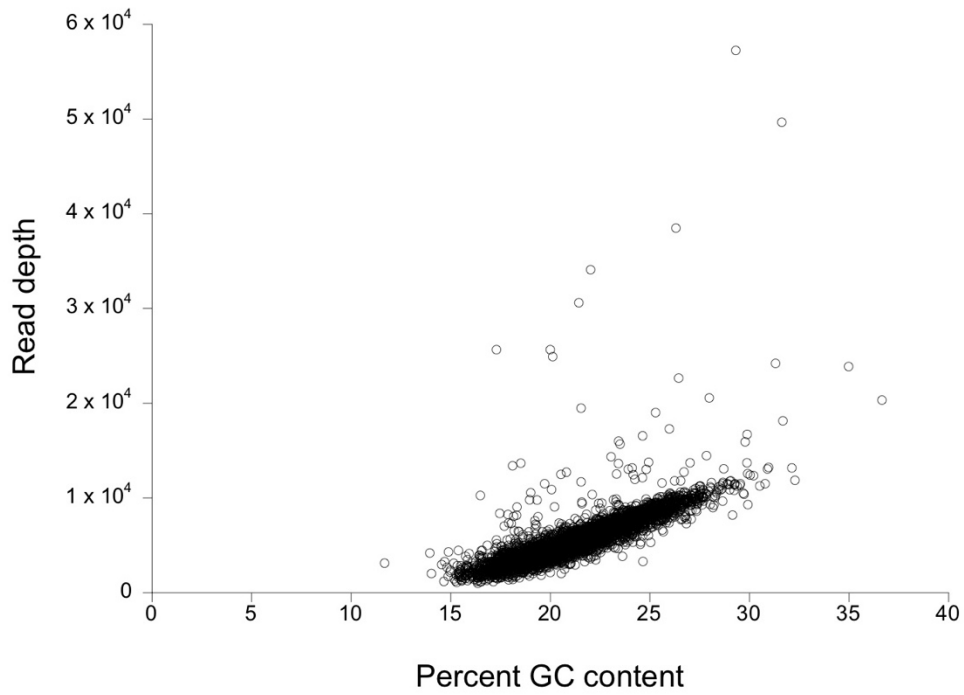

Supplement: 41467_2023_42250_MOESM1_ESM.pdf [file 41467_2023_42250_MOESM1_ESM.pdf]
